# Supplementary material
Source: ML conference proceedings conference paper supplement (https://openreview.net/forum?id=e7MK5Vq44Q)
Supplement: supplementary_material [file attachment]

---

# DynGFN: Towards Bayesian Inference of Gene Regulatory Networks with GFlowNets

---

Anonymous Author(s)

Affiliation

Address

email

## Abstract

1 One of the grand challenges of cell biology is inferring the gene regulatory network  
2 (GRN) which describes interactions between genes and their products that control  
3 gene expression and cellular function. We can treat this as a causal discovery  
4 problem but with two non-standard challenges: (1) regulatory networks are inher-  
5 ently cyclic so we should not model a GRN as a directed acyclic graph (DAG),  
6 and (2) observations have significant measurement noise, so for typical sample  
7 sizes there will always be a large equivalence class of graphs that are likely given  
8 the data, and we want methods that capture this uncertainty. Existing methods  
9 either focus on challenge (1), identifying *cyclic* structure from dynamics, or on  
10 challenge (2) learning complex Bayesian *posteriors* over DAGs, but not both. In  
11 this paper we leverage the fact that it is possible to estimate the “velocity” of gene  
12 expression with *RNA velocity* techniques to develop an approach that addresses  
13 both challenges. Because we have access to velocity information, we can treat the  
14 Bayesian structure learning problem as a problem of sparse identification of a dy-  
15 namical system, capturing cyclic feedback loops through time. Since our objective  
16 is to model uncertainty over a discrete structures, we leverage Generative Flow  
17 Networks (GFlowNets) to estimate the posterior distribution over the combinatorial  
18 space of possible sparse dependencies. Our results indicate that our method learns  
19 posteriors that better encapsulate the distributions of cyclic structures compared to  
20 counterpart state-of-the-art Bayesian structure learning approaches.

## 21 1 Introduction

22 Inferring gene regulatory networks (GRNs) is a long standing problem in cell biology [25, 44]. If  
23 we knew the GRN, it would dramatically simplify the design of biological experiments and the  
24 development of drugs because it would serve as a map of which genes to perturb to manipulate  
25 protein and gene expression. GRNs concisely represent the complex system of directed interactions  
26 between genes and their regulatory products that govern cellular function through control of RNA  
27 (gene) expression and protein concentration. We can treat GRN inference as a causal discovery  
28 problem by treating the regulatory structure between genes (variables) as causal dependencies (edges)  
29 that we infer / rule out by using gene expression data. Structure learning methods aim to automate  
30 this task by inferring a set of directed acyclic graphs (DAGs) that are consistent with the conditional  
31 independencies that we can measure among the variables [13, 41, 42]. While there may be multiple  
32 DAGs in this set—the “Markov equivalence class”—when we are able to perturb the variables with  
33 enough experimental interventions, it is possible to uniquely identify a causal graph [17].

34 However, structure learning for inferring GRNs comes with two non-standard challenges: (1) gene  
35 regulation contains inherent cyclic feedback mechanisms, hence we should not model a GRN as a  
36 DAG, and (2) observations are limited and have significant measurement noise, hence there exists a

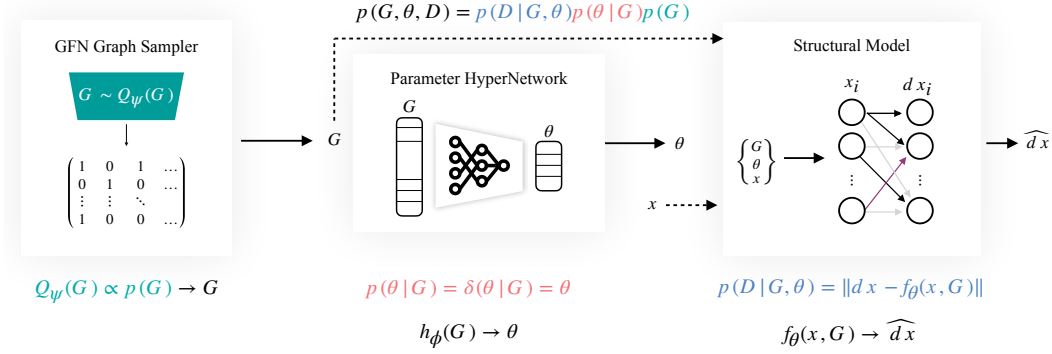

Figure 1: Architecture for Bayesian structure learning of dynamical systems. DynGFN consists of three main components: A GFlowNet modeling a posterior distribution over graphs  $Q(G|\mathcal{D})$ , a HyperNetwork modeling a posterior over parameters given a graph  $Q(\theta|G, D)$ , and the structural equation model scoring  $G$  and  $\theta$  according to how well they fit the data. Although the figure shows the case where  $Q(G|\mathcal{D})$  is modelled with a GFlowNet, this can be any arbitrary graph sampler that can sample discrete structures  $G \sim Q(G|\mathcal{D})$ .

large equivalence class of graphs that are likely given datasets with typical sample sizes. Existing methods either focus on (1) – identifying graphs with *cyclic* structure by leveraging dynamics [14, 12] or assuming the system is in equilibrium [36], or (2) – learning complex Bayesian *posteriors* over explanatory DAGs [11], but not both. In this work, we address both challenges concurrently in a fully differentiable end-to-end pipeline (see Figure 1).

To accomplish this, we treat structure learning as a problem of sparse identification of a dynamical system. From a dynamical systems perspective, one can model both causal structure between variables as well as their time-dependent system response with the drift function [37, 43]. We leverage the fact that we can estimate the rate of change of a gene’s expression (velocity) with *RNA velocity* methods [8]. This data takes the form of dynamic tuple pairs  $(x, dx)$ , which we can use to pose the dynamical system learning problem as a regression task (see Figure 1). This significantly simplifies the learning objective as we can model system dynamics while also learning structure without the need for numerically intensive differential equation solvers. We view this as a step towards Bayesian structure learning from continuous dynamics – we term this *Bayesian dynamic structure learning*.

Our approach estimates the posterior over the sparse dependencies and parameters of the dynamical system. This is important in scientific applications because it is usually prohibitively expensive to acquire a enough data to uniquely identify the true graph underlying a data generating process. Capturing the complex distribution over candidate structure is critical for downstream scientific applications and is an essential step in active causal discovery [39, 52, 18]. This is especially important in settings where experiments are expensive, e.g. conducting genetic perturbations for inference of GRNs. *Bayesian structure learning* is a class of methods that try to model this distribution over structure from observed data. These methods model posteriors over admissible structures  $P(G|D)$  that explain the observations [32, 10, 4, 11, 31], but focus on modelling distributions over DAGs.

Our approach leverages Generative Flow Networks (GFlowNets) to model complex distributions over *cyclic* structures. GFlowNets [6, 7] parameterize the distribution over any discrete object (e.g. graphs) through a sequential policy, and as a result avoid needing to make restrictive parametric assumptions on the distribution. This makes them a useful tool in structure learning, particularly in cases where  $P(G|D)$  is discrete and complex [11]. In this work, we use GFlowNets to learn posteriors over the sparse structure in a dynamical system, and separately learn the posteriors over the parameters of the drift function via a HyperNetwork [15] that conditions on inferred structures. Our main contributions are summarized as follows:

- We develop a novel framework for Bayesian structure learning under the lens of dynamical system identification for modelling complex posteriors over cyclic graphs. We consider flexible parameterizations for the structural model such that we can capture both linear and non-linear dynamic relationships.

- We design a novel GFlowNet architecture, Dynamic GFlowNet (DynGFN), tailored for modelling posteriors over cyclic structures. We propose a *per-node* factorization within DynGFN that enables efficient search over the discrete space of cyclic graphs.
- We empirically evaluated DynGFN on synthetic dynamic data designed to induce highly multi-modal posteriors over graphs.
- We showcase the use of DynGFN on a real biological system using single-cell RNA-velocity data for learning posteriors of GRNs.

## 2 Related Work

There is a lot of prior work on the problem of identifying causal structure  $G$  from either observational [e.g. 49, 54, 35] or interventional [e.g. 26, 29, 38] data, but the majority of existing methods return only the most likely DAG under the observed data. Bayesian approaches attempt to explicitly model this distribution over admissible DAGs.

**Bayesian Structure Learning:** Recently, there has been significant interest in fully differentiable Bayesian methods for structure learning in the static case. DiBS [32], BCD-Nets [10], VCN [4], and DAG-GFlowNet [11] all attempt to learn a distribution over structural models from a fully observed system. The key difference is in how these methods parameterize the graph. DiBS is a particle variational inference method that uses two matrices  $U$  and  $V$  where  $G = \text{sigmoid}(U^T V)$  where the sigmoid is applied elementwise which is similar to graph autoencoders. BCD-Nets and DP-DAG use the Gumbel-Sinkhorn distribution to parameterize a permutation and direct parameterization of a lower triangular matrix. VCN uses an autoregressive LSTM to generate the graph as this gets rid of the standard uni-modal constraint of Gaussian distributed parameters. DAG-GFN has shown success for modelling  $P(G|\mathcal{D})$  [11]. However, it remains restrictive to assume the underlying structure of the observed system is a DAG as natural dynamical systems typically contain regulating feedback mechanisms. This can be particularly challenging for GFlowNets since including cycles in the underlying structure exponentially increases the discrete search space. We show that under certain assumptions we can in part alleviate this shortcoming for learning Bayesian posteriors over cyclic structures for dynamical systems. In small graphs, these methods can model the uncertainty over possible models (including over Markov equivalence classes).

**Dynamic and Cyclic Structure Learning:** There has been comparatively little work towards Bayesian structure learning from dynamics. Recent works in this direction based on NeuralODEs [9] propose a single explanatory structure [50, 5, 1, 2]. CD-NOD leverages heterogeneous non-stationary data for causal discovery when the underlying generative process changes over time [53, 20]. A similar approach uses non-stationary time-series data for causal discovery and forecasting [19]. DYNOTEARS is a score-based approach that uses time-series to learn structure [40]. However, these methods do not attempt to explicitly model a distribution over the explanatory structure. Other methods aim to learn cyclic dependencies in the underlying graph [23, 36, 28, 3]. For instance, [23] propose an iterative method that leverages interventional data to learn directed cyclic graphs. It is suggested that CD-NOD is also extendable to learn cyclic structure [20]. But these methods do not model a posterior over structure. In general, there remains a gap for the problem of Bayesian structure learning over cyclic graphs.

We include further discussion on related work for GRN inference from single-cell transcriptomic data and cell dynamics in Appendix C.1.

## 3 Preliminaries

### 3.1 Bayesian Dynamic Structure Learning

**Problem Setup:** We consider a finite dataset,  $\mathcal{D}$ , of dynamic pairs  $(x, dx) \in \mathbb{R}^d \times \mathbb{R}^d$  where  $x$  represents the state of the system sampled from an underlying time-invariant stochastic dynamical system governed by a latent drift  $\frac{dx}{dt} = f(x, \epsilon)$  where  $\epsilon$  is a noise term that parameterizes the SDE;  $x$  and  $\epsilon$  are mutually independent. The latent drift has some fixed sparsity pattern i.e.  $\frac{\partial f_i}{\partial x_j} \neq 0$  for a small set of variables, which can be parameterized by a graph  $G$  such that  $g_{ij} = \mathbf{1}[\frac{\partial f_i}{\partial x_j} \neq 0]$ , where

121  $g_{ij} \in G, i = 1, \dots, d, j = 1, \dots, d$ . The variables  $x_j$  for which  $\frac{\partial f_i}{\partial x_j} \neq 0$  can be interpreted as the  
 122 causal parents of  $x_i$ , denoted  $\text{Pa}(x_i)$ . This lets us define an equivalent dynamic structural model  
 123 [37, 43] of the form,

$$\frac{dx_i(t)}{dt} = f_i(\text{Pa}(x_i), \epsilon_i), \quad (1)$$

124 for  $i = 1, \dots, d$ . For the graph  $G$  to be identifiable, we assume that all relevant variables are observed,  
 125 such that *causal sufficiency* is satisfied.

126 Our goal is to model our posterior over explanatory graphs  $Q(G|\mathcal{D})$  given the data. We aim to  
 127 jointly learn distribution over parameters  $\theta$  that parameterize the latent drift  $f(x)$ ; these parameters  
 128 will typically depend on the sparsity pattern such that, i.e.  $p(\theta|G) \neq p(\theta)$ . We can factorize this  
 129 generative model as follows,

$$p(G, \theta, \mathcal{D}) = p(\mathcal{D}|G, \theta)p(\theta|G)p(G) \quad (2)$$

130 This factorization forms the basis of our inference procedure. We learn a parameterized function  
 131  $f_\theta(x) : \mathbb{R}^d \rightarrow \mathbb{R}^d$  that approximates the structural model defined in (1). To model this joint  
 132 distribution, we need a way of representing,  $P(G)$ , a distribution over the combinatorial space of  
 133 possible sparsity patterns, and  $P(\theta|G)$ , the posterior over the parameters of  $f_\theta$ . We use GFlowNets  
 134 [6] represent  $P(G)$ , and a HyperNetwork to parameterize  $P(\theta|G)$ .

### 135 3.2 Generative Flow Networks

136 GFlowNets are an approach for learning generative models over spaces of discrete objects [6, 7].  
 137 GFlowNets learn a stochastic policy  $P_F(\tau)$  to sequentially sample an object  $\mathbf{x}$  from a discrete space  
 138  $\mathcal{X}$ . Here  $\tau = (s_0, s_1, \dots, s_n)$  represents a full Markovian trajectory over plausible discrete states,  
 139 where  $s_n$  is the terminating state (i.e. end of a trajectory) [34]. The GFlowNet is trained such that at  
 140 convergence, sequential samples from the stochastic policy over a trajectory,  $\mathbf{x} \sim P_F(\tau)$ , i.e.  $\mathbf{x} = s_n$ ,  
 141 are equal in distribution to samples from the normalized reward distribution  $P(x) = \frac{R(\mathbf{x})}{\sum_{\mathbf{x}' \in \mathcal{X}} R(\mathbf{x}')}.$   
 142 The GFlowNet policies are typically trained by optimizing either the *Trajectory Balance* (TB)  
 143 loss [34], *Subtrajectory Balance* (Sub-TB) loss [33], or the *Detailed Balance* (DB) loss [11]. In this  
 144 work, we exploit the DB loss to learn a stochastic policy for directed graph structure.

145 **Detailed Balance Loss:** The DB loss [11] leverages the fact that the reward function can be  
 146 evaluated for any partially constructed graph (i.e. any prefix of  $\tau$ ), and hence we get intermediate  
 147 reward signals for training the GFlowNet policy. The DB loss is defined as:

$$\mathcal{L}_{\text{DB}}(s_i, s_{i-1}) = \left( \log \frac{R(s_i)P_B(s_{i-1}|s_i; \psi)P_F(s_n|s_{i-1}; \psi)}{R(s_{i-1})P_F(s_i|s_{i-1}; \psi)P_F(s_n|s_i; \psi)} \right)^2, \quad (3)$$

148 where  $P_F(s_i|s_{i-1}; \psi)$  and  $P_B(s_{i-1}|s_i; \psi)$  represent the forward transition probability and backward  
 149 transition probability, and a trainable normalizing constant, respectively. Under this formulation,  
 150 during GFlowNet training the reward is evaluated at every state. For this reason, the DB formulation  
 151 is in general advantageous for the structure learning problem where any sampled graph can be viewed  
 152 as a complete state, hence more robustly inform gradients when training the stochastic policy than  
 153 counterpart losses. Previous work has shown GFlowNets are useful in settings with multi-modal  
 154 posteriors. This is of particular interest to us where many admissible structures can explain the  
 155 observed data equally well. We model  $Q_\psi(G)$  using  $P_F(s_i|s_{i-1}; \psi)$  and learn the parameters  $\psi$ .

## 156 4 DynGFN for Bayesian Dynamic Structure Learning

157 We present a general framework for Bayesian dynamic structure learning and propose a GFlowNet  
 158 architecture, DynGFN, tailored for modelling a posterior over discrete cyclic graphical structures.  
 159 We summarize our framework in Figure 1 and Algorithm 1. DynGFN consists of 3 key modules:

- 160 1. A graph sampler that samples graphical structures that encode the structural dependencies  
 161 among the observed variables. This is parameterized with a GFlowNet that iteratively adds  
 162 edges to a graph.

---

**Algorithm 1** Batch update training of DynGFN

---

```

1: Input: Data batch  $(x_b, dx_b)$ , initial NN weights  $\psi, \phi$ ,  $L^0$  sparsity prior  $\lambda_0$ , and learning rate  $\epsilon$ .
2:  $s_0 \leftarrow \mathbf{0}_{B \times d \times d}$   $\triangleright$  Training is paralleled over  $B$  graph trajectories
3:  $a \sim P_F(s_1|s_0; \psi)$ ,  $\triangleright$  Sample initial actions vector
4: while  $a$  not  $\emptyset$  do
5:   Compute  $P_F(s_i|s_{i-1}; \psi)$ ,  $P_B(s_{i-1}|s_i; \psi)$ 
6:    $\theta \leftarrow h_\phi(s_i)$ 
7:    $\widehat{dx}_b \leftarrow f_\theta(x, s_i)$ 
8:    $R_i(s_i) \leftarrow e^{-\|dx_b - \widehat{dx}_b\|_2^2 + \lambda_0 \|s_i\|_0}$ 
9:    $\psi \leftarrow \psi - \epsilon \nabla_\psi \mathcal{L}_{DB}(s_i, s_{i-1})$   $\triangleright \mathcal{L}_{DB}(s_i, s_{i-1})$  computed as in Equation 3
10:   $a \sim P_F(s_i|s_{i-1}; \psi)$ ,  $s_i \rightarrow s_{i+1}$   $\triangleright$  Take action step to go to next state
11:  $\phi \leftarrow \phi - \epsilon \nabla_\phi \log R$ 
return Updated GFN weights  $\psi$  and updated HyperNetwork weights  $\phi$ .

```

---

- 163 2. A model that approximates the structural equations defined in (1) to model the functional  
164 relationships between the observed variables, indexed by parameters  $\theta$ . This is a class of  
165 functions that respect the conditional independencies implied by the graph sampled in step  
166 1. We enforce this by masking inputs according to the graph.
- 167 3. Because the functional relationships between variables may be different depending on which  
168 graph is sampled, we use a HyperNetwork architecture that outputs the parameters  $\theta$  of the  
169 structural equations as a function of the graph. We also show that under linear assumptions  
170 of the structural modules, we can solve for optimal  $\theta$  analytically (i.e. we do not need the  
171 HyperNetwork).

172 For training, we assume  $L^0$  sparsity of graphs  $G$  to constrain the large discrete search space over  
173 possible structures. We use a reward  $R$  for a graph  $G$  and  $L^0$  penalty of the form:  $R(G) =$   
174  $e^{-\|dx - \widehat{dx}\|_2^2 + \lambda_0 \|G\|_0}$ . We motivate this set-up so we can estimate  $\widehat{dx}$  close to  $dx$  in an end-to-end  
175 learning pipeline. Since estimates for  $\widehat{dx}$  are dependent on  $G$  and  $\theta$ , this reward informs gradients to  
176 learn a policy that can approximate  $Q(G)$  given dynamic data.

177 The main advantage of DynGFN comes when modelling complex posteriors with many modes. Prior  
178 work has shown GFlowNets are able to efficiently model distributions where we can share information  
179 between different modes [34]. The challenge we tackle is how to do this with a changing objective  
180 function, as the GFlowNet objective is a function of the current parameter HyperNetwork and the  
181 structural equations. We use multilayer perceptrons (MLPs) to parameterize the stochastic GFlowNet  
182 policy, HyperNetwork architecture, and the dynamic structural model<sup>1</sup>.

#### 183 4.1 Graph Sampler

184 DynGFN models a posterior distribution over graphs  $Q(G|\mathcal{D})$  given a finite set of observations. To  
185 learn  $Q(G|\mathcal{D})$ , DynGFN needs to explore over a large discrete state space. Since we aim to learn  
186 a bipartite graph between  $x$  and  $dx$ , DynGFN needs to search over  $2^{d^2}$  possible structures, where  
187  $d$  denotes the dimensionality of the system and  $2^{d^2}$  the number of possible edges in  $G$ . For even  
188 moderate  $d$ , this discrete space is very large (e.g. for  $d = 20$  we have  $2^{400}$  possible graphs).

189 However, under the assumption of causal sufficiency, we can significantly reduce this search space,  
190 by taking advantage of the fact that  $Q(G|\mathcal{D})$  factorizes as follows,

$$Q(G|\mathcal{D}) = \prod_{i \in [1, \dots, d]} Q_i(G[\cdot, i]|\mathcal{D}) \quad (4)$$

191 By using this model, we reduce the search space from  $2^{d^2} \rightarrow d2^d$ . For  $d = 20$  this is  $\approx 2^{104}$ . While  
192 still intractable to search over, it is still a vast improvement over the unfactorized case. We call this  
193 model a *per-node* posterior, and we use a per-node GFlowNet going forward. We discuss details  
194 regarding encouraging forward policy exploration during training in Appendix B.6.

---

<sup>1</sup>When we assume linear dynamic structural relationships, we can solve for the parameters analytically, thus  
do not need MLPs for the HyperNetwork and dynamic structural model. This is further discussed in section 4.2



## 4.2 HyperNetwork and Structural Model

We aim to jointly learn the structural encoding  $G$  and parameters  $\theta$  that together model the structural relationships  $dx = f_\theta(x, G)$  of the dynamical system variables. To accomplish this, we propose learning an individual set of parameters  $\theta$  for each graph  $G$ , independent of the input data  $x$ . This approach encapsulates  $P(\theta|G)$  in (2). We use a HyperNetwork architecture that takes  $G$  as input and outputs the structural equation model parameters  $\theta$ , i.e.  $\theta = h_\phi(G)$  hence  $P(\theta|G) = \delta(\theta|G)$  – allowing us to learn a separate  $\theta$  for each  $G$ . This HyperNetwork model does not capture uncertainty in the parameters, however the formulation may be extended to the Bayesian setting by placing a prior on the HyperNetwork parameters  $\phi$ . Although  $h_\phi$  allows for expressive parameterizations for  $\theta$ , it may not be easy to learn<sup>2</sup>. HyperNetworks have shown success in learning parameters for more complex models (e.g. LSTMs and CNNs) [15], hence motivates their fit for our application.

**Linear Assumption on Dynamic Structural Model:** In addition to analytically modelling linear systems, in some cases it may suffice to assume a linear differential form  $\frac{dx}{dt} = Ax$  to approximate dynamics. In this setting, given a sampled graph  $G \sim Q(G)$  and  $n$  i.i.d. observations of  $(x, dx)$  we can solve for  $\theta = A$  analytically. To induce dependence on the graph structure, we use the sampled  $G$  as a mask on  $x$  and construct  $\tilde{x}_i = G_i^T \odot x$ . Then we can solve for  $\theta$  on a per-node basis as

$$\theta_i = (\tilde{x}_i^T \tilde{x}_i + \lambda I)^{-1} \tilde{x}_i^T dx_i, \quad (5)$$

where  $i = 1, \dots, d$ ,  $\lambda > 0$  is the precision of an independent Gaussian prior over the parameters, and  $I$  is the identity matrix. We use  $\lambda = 0.01$  throughout this work.

## 5 A Useful Model of Indeterminacy

In order to evaluate DynGFN ability to model complex posteriors over graphs, we need a structure learning problem with a large equivalence class of admissible graphs. We present a simple way to augment a set of identifiable dynamics under some model to create a combinatorial number of equally likely dynamics under the same model. More specifically, this creates a ground truth posterior  $Q^*(G|D) \propto \sum T(G^*)$  where  $T(\cdot) : \mathcal{G} \rightarrow \mathcal{G}$  is an analytically computable transformation over graphs and  $G^*$  is the identified graph under the original dynamics. We use this system to test how well we can learn a posterior over structures that matches what we see in single-cell data.

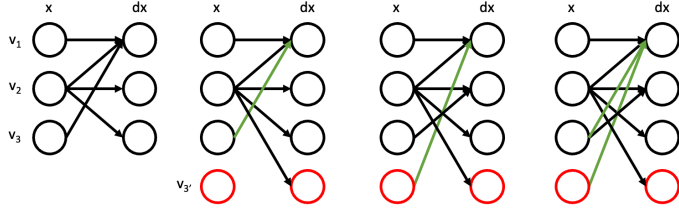

Figure 2: For an identifiable graph, we add a new variable which has the same values as  $v_3$  and creates three possible explanations for the data (green). If we consider a sparsity penalty, then we can eliminate the last possibility (which has two additional edges) for only two possible graphs.

Specifically, given a dataset of  $(x, dx) \in \mathbb{R}^d \times \mathbb{R}^d$  pairs, we create a new dataset with  $d + 1$  variables where the ‘new’ variable  $v'$  is perfectly correlated with an existing variable  $v$ . In causal terms, this new variable inherits the same parents as  $v$ , that is  $\text{Pa}(v') := \text{Pa}(v)$  and the same structural equations as  $v$ , that is  $dv' = dv$ . This is depicted in Figure 2. This creates a number of new possible explanatory graphs, which we generalize with the following proposition.

**Proposition 1.** *Given any  $d$  dimensional ODE system with  $\mathcal{G}^*$  identifiable under  $f \in \mathcal{F}$ , the  $D = d + a$  dimensional system  $\frac{dx}{dt} = Ax$ , denote the vector of multiplicities  $m \in \mathbb{N}^d$  with  $m_i$  as the number of repetitions of each variable. Then this construction creates an admissible family of graphs  $\mathcal{G}'$  where  $|\mathcal{G}'| = \prod_{i \in d} (2^{m_i} - 1)^{\mathcal{G}_i^*}$ . Furthermore, under an  $L^0$  penalty on  $G$ , this reduces to  $\prod_i (m_i)^{\mathcal{G}_i^*}$ .*

See Appendix A for full proof. The intuition behind this proposition can be seen from the case of adding a single copied variable. This corresponds to  $A = [\delta_v I_d]$  where  $\delta_v$  is a vector with a 1 on

<sup>2</sup>We discuss training dynamics when using  $h_\phi$  in Appendix B.7.

Table 1: Bayesian dynamic structure learning of linear and non-linear systems with  $d = 20$  variables. The graphs representing the structural dynamic relationships of the linear and non-linear systems have 50 edges out of possible 400. The ground truth discrete distribution  $P(G^*)$  contains 1024 admissible graphs for each respective system. The  $\ell$  and  $h$  pre-fix denote usage of the analytic linear solver and HyperNetwork solver for structural model parameters, respectively. Results are reported on held out test data over 5 model seeds.

| Model           | Bayes-SHD ↓                      | Linear System                     |                                       | KL ↓                                            | NLL ↓ |
|-----------------|----------------------------------|-----------------------------------|---------------------------------------|-------------------------------------------------|-------|
|                 |                                  | AUC ↑                             |                                       |                                                 |       |
| $\ell$ -DynBCD  | $32.0 \pm 0.27$                  | $0.71 \pm 0.0$                    | $1707.45 \pm 9.66$                    |                                                 | —     |
| $\ell$ -DynDiBS | $29.2 \pm 0.78$                  | $0.71 \pm 0.0$                    | $6622.43 \pm 171.67$                  |                                                 | —     |
| $\ell$ -DynGFN  | <b><math>22.8 \pm 1.4</math></b> | <b><math>0.75 \pm 0.01</math></b> | <b><math>1091.60 \pm 35.72</math></b> |                                                 | —     |
| $h$ -DynBCD     | <b><math>5.5 \pm 1.1</math></b>  | $0.89 \pm 0.04$                   | $701.19 \pm 46.99$                    | $(9.83 \pm 0.59)\text{E} - 5$                   |       |
| $h$ -DynDiBS    | $28.5 \pm 4.2$                   | $0.51 \pm 0.07$                   | $7934.90 \pm 381.80$                  | <b><math>(8.17 \pm 1.30)\text{E} - 6</math></b> |       |
| $h$ -DynGFN     | <b><math>6.7 \pm 0.0</math></b>  | <b><math>0.94 \pm 0.0</math></b>  | <b><math>350.92 \pm 30.15</math></b>  | $(8.35 \pm 0.02)\text{E} - 3$                   |       |

  

| Model           | Bayes-SHD ↓                      | Non-linear System                 |                                     | KL ↓                                            | NLL ↓ |
|-----------------|----------------------------------|-----------------------------------|-------------------------------------|-------------------------------------------------|-------|
|                 |                                  | AUC ↑                             |                                     |                                                 |       |
| $\ell$ -DynBCD  | $77.5 \pm 8.3$                   | $0.42 \pm 0.03$                   | $3814.86 \pm 354.56$                |                                                 | —     |
| $\ell$ -DynDiBS | $75.7 \pm 7.7$                   | <b><math>0.59 \pm 0.01</math></b> | $5893.65 \pm 59.66$                 |                                                 | —     |
| $\ell$ -DynGFN  | <b><math>45.7 \pm 0.6</math></b> | $0.55 \pm 0.0$                    | <b><math>226.25 \pm 6.58</math></b> |                                                 | —     |
| $h$ -DynBCD     | $192.9 \pm 0.7$                  | $0.50 \pm 0.0$                    | $9108.69 \pm 51.34$                 | $(3.83 \pm 0.32)\text{E} - 4$                   |       |
| $h$ -DynDiBS    | $48.1 \pm 9.0$                   | $0.53 \pm 0.10$                   | $8716.64 \pm 265.29$                | <b><math>(4.06 \pm 0.10)\text{E} - 6</math></b> |       |
| $h$ -DynGFN     | <b><math>32.6 \pm 0.9</math></b> | <b><math>0.67 \pm 0.01</math></b> | <b><math>193.28 \pm 8.53</math></b> | $(1.47 \pm 0.11)\text{E} - 3$                   |       |

node  $v$  and zeros elsewhere, and  $I_d$  is the  $d$ -dimensional identity matrix. Let  $v$  have  $c$  children, such that  $v \in Pa(c)$  in the identifiable system, then any of those  $c$  child nodes could depend either on  $v$  or on the new node  $v'$  or both. This creates  $3^c$  possible explanatory graphs. If we restrict ourselves to the set of graphs with minimal  $L^0$  norm, then we eliminate the possibility of a child node depending on both  $v$  and  $v'$ , this gives  $2^c$  possible graphs, choosing either  $v$  or  $v'$  as a parent.

## 6 Experimental Results

In this section we evaluate the performance of DynGFN against counterpart Bayesian structure learning methods (see Appendix B.2 for details). Since our primary objective is to learn Bayesian posteriors over discrete structure  $G$ , we compare to Bayesian methods that can also accomplish this task, i.e. versions of BCD-Nets [10] and DiBS [32]. We show in certain cases, DynGFN is able to better capture the true posterior when there are a large number of modes. We evaluate methods according to four metrics: Bayes-SHD, area under the receiver operator characteristic curve (AUC), Kullback–Leibler (KL) divergence between learned posteriors  $Q(G)$  and the distribution over true graphs  $P(G^*)$ , and the negative log-likelihood (NLL)  $P(D|G, \theta)$  (in our setting this reduces to the mean squared error between  $\widehat{dx}$  and  $dx$ , given  $\theta$  and sampled  $G'$ s). Since the analytic linear solver requires data at run-time to compute optimal parameters for the structural model, we include the NLL metric only for models using the HyperNetwork solver. Bayes-SHD measures the average distance to the closest structure in the admissible set of graphs according to the structural hamming distance, which in this case is simply the hamming distance of the adjacency matrix representation to the closest admissible graph. We assume  $P(G^*)$  is uniform over  $G^*$  and include further details about evaluating the quality of learned posteriors in Appendix B.8.

### 6.1 Experiments with Synthetic Data

We generated synthetic data from two systems using our indeterminacy model presented in section 5: (1) a linear dynamical system  $dx = Ax$ , and (2) a non-linear dynamical system  $dx = \text{sigmoid}(Ax)$ . We consider  $\ell$ -DynGFN and  $h$ -DynGFN, i.e. DynGFN with the linear analytic parameter solver as shown in (5), and DynGFN with the HyperNetwork parameter solver  $h_\phi$ . Likewise, we compare  $\ell$ -DynGFN and  $h$ -DynGFN to counterpart Bayesian baselines which we call  $\ell$ -DynBCD,  $\ell$ -DynDiBS,  $h$ -DynBCD, and  $h$ -DynDiBS. To constrain the discrete search procedure, we assume a sparse prior on the structure the graphs  $G$ , specifically the  $L^0$  prior. Due to challenging iterative optimization dynamics present when using  $\theta = h_\phi(G)$  for DynGFN, to train initialize the forward policy  $P_F(s_i|s_{i-1}; \psi)$

using the  $\psi$  learned in  $\ell$ -DynGFN to provide a more admissible starting point for learning  $h_\phi$  (we discuss further details in Appendix B.7). We do not need to do this for  $h$ -DynBCD and  $h$ -DynDiBS as we are able to train both models end-to-end without iterative optimization. In Table 1 we show results of our synthetic experiments for learning posteriors over multi-modal distributions of cyclic graphs. We observe the DynGFN is most competitive on both synthetic systems for modelling the true posterior over structure. Details about DynGFN, baselines, and accompanying hyper-parameters can be found in Appendix B.

## 6.2 Ablations Over Sparsity and Linearity of Dynamic Systems

We conduct two ablations: (1) ablation over sparsity of the dynamic system structure, and (2) ablation over  $\Delta t$ , the time difference between data points of dynamic simulation. For a sparsity level of 0.9, the ground truth graphs have 50 edges out of  $d^2$  possible edges. In these experiments,  $P(G^*)$  has 1024 modes. We conduct the ablations over 5 random seeds for each set of experiments.

**Sparsity:** DynGFN uses the  $L^0$  prior on  $G$  throughout training. Under this setting, system sparsity carries significant weight on the ability to learn posteriors over the structured dynamics of a system. We show this trend in Table 2. We note that computing the KL-divergence for DynGFN, specifically computing the probability generating a true  $G$ , becomes computationally intractable as  $G$  is less sparse<sup>3</sup>. For systems of 0.9 and 0.95 sparsity, we observe a decreasing trend in KL and Bayes-SHD, and an increasing trend in AUC. This result is expected as DynGFN can better traverse sparse graphs as the combinatorial space over possible trajectories is smaller relative to denser systems.

**Linearity:** Training DynGFN via the linear solver for the structural model parameters is an easier objective due to simplified training dynamics. Because of this, we explore the performance of  $\ell$ -DynGFN assuming  $f_\theta$  for modelling equation (1) to be linear in the non-linear system. We do this by conducting an ablation over  $\Delta t$  and find that the performance of  $\ell$ -DynGFN on the non-linear system improves as  $\Delta t \rightarrow 0$ . We show a portion of this trend in Table 3.

Table 2: Ablation for  $\ell$ -DynGFN on  $d = 20$  systems with varying levels of sparsity and fixed  $\Delta t = 0.05$ .

| Sparsity | Bayes-SHD ↓     | AUC ↑           | KL ↓                |
|----------|-----------------|-----------------|---------------------|
| 0.95     | $16.4 \pm 1.71$ | $0.79 \pm 0.0$  | $889.57 \pm 31.24$  |
| 0.90     | $22.8 \pm 1.41$ | $0.75 \pm 0.01$ | $1091.60 \pm 35.72$ |
| 0.85     | $32.8 \pm 0.72$ | $0.71 \pm 0.0$  | —                   |
| 0.80     | $39.2 \pm 0.69$ | $0.71 \pm 0.0$  | —                   |
| 0.75     | $60.2 \pm 1.17$ | $0.66 \pm 0.01$ | —                   |

Table 3: Ablation for  $\ell$ -DynGFN on  $d = 20$  non-linear systems with varying  $\Delta t$  and fixed sparsity at 0.9.

| $\Delta t$ | Bayes-SHD ↓     | AUC ↑          | KL ↓               |
|------------|-----------------|----------------|--------------------|
| 0.001      | $38.7 \pm 0.80$ | $0.61 \pm 0.0$ | $202.41 \pm 9.95$  |
| 0.005      | $39.0 \pm 0.81$ | $0.60 \pm 0.0$ | $206.83 \pm 11.55$ |
| 0.01       | $40.6 \pm 1.13$ | $0.59 \pm 0.0$ | $202.71 \pm 7.74$  |
| 0.05       | $45.7 \pm 0.62$ | $0.55 \pm 0.0$ | $226.25 \pm 6.58$  |
| 0.1        | $51.8 \pm 0.18$ | $0.50 \pm 0.0$ | $264.86 \pm 2.17$  |

## 6.3 Experiments on Single-Cell RNA-velocity Data

To show how DynGFN can be applied to single cell data we use a cell cycle dataset of human Fibroblasts [46]. As a motivating example we show the correlation structure of single-cell RNA-seq data from human Fibroblast cells [46] Figure 3. We show both the raw correlation and the correlation over cell cycle time, which is significantly higher. With such a pure cell population whose primary axis of variation is state in the cell cycle by aggregating over cell cycle time we expect observation noise to be averaged out, leading to a “truer” view of the correlation between latent variables. Further details for this experimental set-up are provided in Appendix C.1.3. Since there are many genes which are affected by the cell cycle phase, there are many correlated variables that are downstream of the true cell cycle regulators. This provides a natural way of using cell cycle data to evaluate a model’s ability to capture the Bayesian posterior. In Table 4 we show results for learning posteriors over an undetermined GRN using RNA velocity data. We find that  $\ell$ -DynGFN and  $h$ -DynGFN yield low KL

<sup>3</sup>For example, since DynGFN constructs one object  $G$  sequentially over a state space distribution, we must compute probabilities of all combinatorial state trajectories for constructing  $G = (s_i, \dots, s_n)$ . The space of combinatorial state trajectories is  $n!$  in nature, hence this computation is only possible for small graphs and/or sparse graphs.



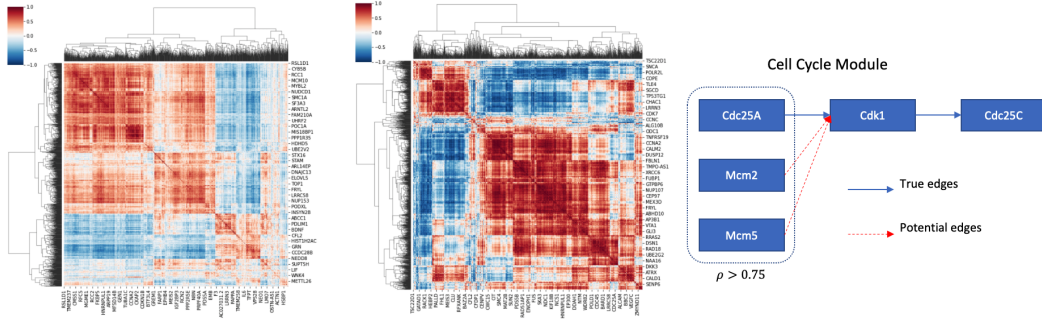

Figure 3: (Left) Correlation structure in the raw single cell data over 5000 cells and 2000 genes selected by scVelo [8] pre-processing. (Middle) Correlation structure among genes over (inferred) cell cycle times. This stronger correlation structure is more reflective of the correlation in the underlying system. (Right) Cdc25A is known to inhibit Cdk1 which is known to inhibit Cdc25C, while the Mcm complex is highly correlated with Cdc25A, they do not directly interact with Cdk1 [24].

Table 4: Bayesian dynamic structure learning 5-D cellular system using scRNA velocity data. The dynamics of this system are unknowns, however we identify 81 admissible graphs between variables (genes) that describe the data. We train models over 5 seeds. The graphs of this system contain of 7 true edges.

| Model           | Cellular System - RNA Velocity |                    |                      |                    |
|-----------------|--------------------------------|--------------------|----------------------|--------------------|
|                 | Bayes-SHD ↓                    | AUC ↑              | KL ↓                 | NLL ↓              |
| $\ell$ -DynBCD  | <b>2.6 ± 0.1</b>               | 0.56 ± 0.01        | 321.95 ± 3.34        | —                  |
| $\ell$ -DynDiBS | 6.5 ± 0.4                      | 0.47 ± 0.01        | 550.17 ± 16.63       | —                  |
| $\ell$ -DynGFN  | <b>3.3 ± 0.4</b>               | <b>0.59 ± 0.03</b> | <b>44.98 ± 18.60</b> | —                  |
| $h$ -DynBCD     | 10.1 ± 0.8                     | 0.53 ± 0.03        | 587.41 ± 24.00       | 0.094 ± 0.003      |
| $h$ -DynDiBS    | 9.6 ± 4.2                      | 0.51 ± 0.13        | 560.85 ± 83.83       | <b>0.084 ± 0.0</b> |
| $h$ -DynGFN     | <b>5.1 ± 1.2</b>               | <b>0.58 ± 0.05</b> | <b>39.82 ± 28.05</b> | 0.109 ± 0.001      |

and moderate Bayes-SHD. While  $\ell$ -DynBCD performs well in terms of identify a small distribution of true  $G$ 's, it falls short in modelling the true posterior (this can be seen from low Bayes-SHD, high KL).

## 7 Conclusion

We presented DynGFN, a method for Bayesian dynamic structure learning. In low dimensions we found that DynGFN is able to better model the distribution over possible explanatory structures than counterpart Bayesian structure learning baseline methods. As a proof of concept, we presented an example of learning the distribution over likely explanatory graphs for linear and non-linear synthetic systems where complex uncertainty over explanatory structure is prevalent. We demonstrate the use of DynGFN for learning gene regulatory structure from single-cell transcriptomic data where there are many possible graphs, showing DynGFN can better model the uncertainty over possible explanations of this data rather than capturing a single explanation.

**Limitations and Future Work:** We have demonstrated a degree of efficacy when using DynGFN for Bayesian structure learning with dynamic observational data. A key limitation of DynGFN is scaling to larger systems. To effectively model  $P(G, \theta, D)$ , DynGFN needs to search over an environment state space of possible graphs. This state space grows exponentially with the number of possible edges, i.e.  $2^{d^2}$  or  $d2^d$  for per-node-GFN where  $d$  is the number of variables in the system. Therefore, DynGFN is currently limited to smaller systems. Nevertheless, there are many applications where Bayesian structure learning, even over 5-20 dimensional examples that we explore here, could be extraordinarily useful. We include further discussion of scaling DynGFN in Appendix C.3 with some ideas on how to approach this challenge. We found that training DynGFN requires some selection of hyper-parameters and in particular parameters that shape the reward function. Selecting hyper-parameters for the baseline methods prove more difficult for this task.

## References

- [1] Aliee, H., Theis, F. J., and Kilbertus, N. Beyond predictions in neural odes: Identification and interventions. *arXiv preprint 2106.12430*, 2021.
- [2] Aliee, H., Richter, T., Solonin, M., Ibarra, I., Theis, F., and Kilbertus, N. Sparsity in continuous-depth neural networks. *Advances in Neural Information Processing Systems (NeurIPS)*, 2022.
- [3] Améndola, C., Dettling, P., Drton, M., Onori, F., and Wu, J. Structure learning for cyclic linear causal models. *Uncertainty in Artificial Intelligence (UAI)*, 2020.
- [4] Annadani, Y., Rothfuss, J., Lacoste, A., Scherrer, N., Goyal, A., Bengio, Y., and Bauer, S. Variational causal networks: Approximate bayesian inference over causal structures. *arXiv preprint*, 2021.
- [5] Bellot, A. and Branson, K. Neural Graphical Modelling in Continuous Time: Consistency Guarantees and Algorithms. *International Conference on Learning Representations (ICLR)*, 2022.
- [6] Bengio, E., Jain, M., Korablyov, M., Precup, D., and Bengio, Y. Flow Network based Generative Models for Non-Iterative Diverse Candidate Generation. *Advances in Neural Information Processing Systems (NeurIPS)*, 2021.
- [7] Bengio, Y., Deleu, T., Hu, E. J., Lahlou, S., Tiwari, M., and Bengio, E. GFlowNet Foundations. *arXiv preprint 2111.09266*, 2022.
- [8] Bergen, V., Lange, M., Peidli, S., Wolf, F. A., and Theis, F. J. Generalizing RNA velocity to transient cell states through dynamical modeling. *BioRxiv preprint 820936*, 2019.
- [9] Chen, R. T. Q., Rubanova, Y., Bettencourt, J., and Duvenaud, D. Neural Ordinary Differential Equations. *Advances in Neural Information Processing Systems (NeurIPS)*, 2018.
- [10] Cundy, C., Grover, A., and Ermon, S. BCD Nets: Scalable Variational Approaches for Bayesian Causal Discovery. *Advances in Neural Information Processing Systems (NeurIPS)*, 2021.
- [11] Deleu, T., Góis, A., Emezue, C., Rankawat, M., Lacoste-Julien, S., Bauer, S., and Bengio, Y. Bayesian Structure Learning with Generative Flow Networks. *Uncertainty in Artificial Intelligence (UAI)*, 2022.
- [12] Friedman, N., Murphy, K., and Russell, S. Learning the structure of dynamic probabilistic networks. *Uncertainty in Artificial Intelligence (UAI)*, 1998.
- [13] Glymour, C., Zhang, K., and Spirtes, P. Review of Causal Discovery Methods Based on Graphical Models. *Frontiers in Genetics*, 2019.
- [14] Granger, C. W. Investigating causal relations by econometric models and cross-spectral methods. *Econometrica: journal of the Econometric Society*, 1969.
- [15] Ha, D., Dai, A. M., and Le, Q. V. Hypernetworks. *International Conference on Learning Representations (ICLR)*, 2017.
- [16] Hashimoto, T. B., Gifford, D. K., and Jaakkola, T. S. Learning Population-Level Diffusions with Generative Recurrent Networks. *International Conference on Machine Learning (ICML)*, 2016.
- [17] Hauser, A. and Bühlmann, P. Characterization and greedy learning of interventional markov equivalence classes of directed acyclic graphs. *Journal of Machine Learning Research (JMLR)*, 13(1), 2012.
- [18] He, Y.-B. and Geng, Z. Active learning of causal networks with intervention experiments and optimal designs. *Journal of Machine Learning Research (JMLR)*, 9, 2008.
- [19] Huang, B., Zhang, K., Gong, M., and Glymour, C. Causal discovery and forecasting in nonstationary environments with state-space models. *International Conference on Machine Learning (ICML)*, 2019.

- [20] Huang, B., Zhang, K., Zhang, J., Ramsey, J., Sanchez-Romero, R., Glymour, C., and Schölkopf, B. Causal discovery from heterogeneous/nonstationary data. *The Journal of Machine Learning Research (JMLR)*, 21, 2020.
- [21] Huguët, G., Magruder, D. S., Tong, A., Fasina, O., Kuchroo, M., Wolf, G., and Krishnaswamy, S. Manifold interpolating optimal-transport flows for trajectory inference. *Advances in Neural Information Processing Systems (NeurIPS)*, 2022.
- [22] Huguët, G., Tong, A., Zapatero, M. R., Wolf, G., and Krishnaswamy, S. Geodesic Sinkhorn: Optimal transport for high-dimensional datasets. *arXiv preprint 2211.00805*, 2022.
- [23] Itani, S., Ohannessian, M., Sachs, K., Nolan, G. P., and Dahleh, M. A. Structure learning in causal cyclic networks. *Proceedings of Workshop on Causality: Objectives and Assessment at NIPS 2008*, 2010.
- [24] Kanehisa, M., Furumichi, M., Sato, Y., Ishiguro-Watanabe, M., and Tanabe, M. KEGG: Integrating viruses and cellular organisms. *Nucleic Acids Research*, 49, 2021.
- [25] Karlebach, G. and Shamir, R. Modelling and analysis of gene regulatory networks. *Nature reviews Molecular cell biology*, 9, 2008.
- [26] Ke, N. R., Bilaniuk, O., Goyal, A., Bauer, S., Larochelle, H., Pal, C., and Bengio, Y. Learning neural causal models from unknown interventions. *arXiv preprint 1910.01075*, 2019.
- [27] La Manno, G., Soldatov, R., Zeisel, A., Braun, E., Hochgerner, H., Petukhov, V., Lidschreiber, K., Kastrioti, M. E., Lönnerberg, P., Furlan, A., Fan, J., Borm, L. E., Liu, Z., van Bruggen, D., Guo, J., He, X., Barker, R., Sundström, E., Castelo-Branco, G., Cramer, P., Adameyko, I., Linnarsson, S., and Kharchenko, P. V. RNA velocity of single cells. *Nature*, 560, 2018.
- [28] Lacerda, G., Spirtes, P. L., Ramsey, J., and Hoyer, P. O. Discovering cyclic causal models by independent components analysis. *arXiv preprint 1206.3273*, 2012.
- [29] Lachapelle, S., Brouillard, P., Deleu, T., and Lacoste-Julien, S. Gradient-Based Neural DAG Learning. *International Conference on Learning Representations (ICLR)*, 2020.
- [30] Liu, Q. and Wang, D. Stein variational gradient descent: A general purpose bayesian inference algorithm. *Advances in Neural Information Processing Systems (NeurIPS)*, 2016.
- [31] Lopez, R., Hütter, J.-C., Pritchard, J. K., and Regev, A. Large-scale differentiable causal discovery of factor graphs. *Advances in Neural Information Processing Systems (NeurIPS)*, 2022.
- [32] Lorch, L., Rothfuss, J., Schölkopf, B., and Krause, A. DiBS: Differentiable Bayesian Structure Learning. *Advances in Neural Information Processing Systems (NeurIPS)*, 2021.
- [33] Madan, K., Rector-Brooks, J., Korablyov, M., Bengio, E., Jain, M., Nica, A., Bosc, T., Bengio, Y., and Malkin, N. Learning gflownets from partial episodes for improved convergence and stability. *arXiv preprint 2209.12782*, 2022.
- [34] Malkin, N., Jain, M., Bengio, E., Sun, C., and Bengio, Y. Trajectory Balance: Improved Credit Assignment in GFlowNets. *Advances in Neural Information Processing Systems (NeurIPS)*, 2022.
- [35] Monti, R. P., Zhang, K., and Hyvärinen, A. Causal discovery with general non-linear relationships using non-linear ica. *Uncertainty in Artificial Intelligence (UAI)*, 2020.
- [36] Mooij, J. M., Janzing, D., Heskes, T., and Schölkopf, B. On causal discovery with cyclic additive noise models. *Advances in Neural Information Processing Systems (NeurIPS)*, 2011.
- [37] Mooij, J. M., Janzing, D., and Schölkopf, B. From Ordinary Differential Equations to Structural Causal Models: The deterministic case. *Uncertainty in Artificial Intelligence (UAI)*, 2013.
- [38] Mooij, J. M., Magliacane, S., and Claassen, T. Joint causal inference from multiple contexts. *The Journal of Machine Learning Research (JMLR)*, 21, 2020.

- 437 [39] Murphy, K. P. Active learning of causal bayes net structure. Technical report, UC Berkeley,  
438 2001.
- 439 [40] Pamfil, R., Sriwattanaworachai, N., Desai, S., Pilgerstorfer, P., Georgatzis, K., Beaumont, P.,  
440 and Aragam, B. Dynotears: Structure learning from time-series data. *International Conference*  
441 *on Artificial Intelligence and Statistics (AISTATS)*, 2020.
- 442 [41] Pearl, J. *Causality*. Caimbridge University Press, second edition, 2009.
- 443 [42] Peters, J., Janzing, D., and Schölkopf, B. *Elements of causal inference: foundations and*  
444 *learning algorithms*. The MIT Press, 2017.
- 445 [43] Peters, J., Bauer, S., and Pfister, N. Causal models for dynamical systems. *Probabilistic and*  
446 *Causal Inference: The Works of Judea Pearl*, 2022.
- 447 [44] Pratapa, A., Jaliha, A. P., Law, J. N., Bharadwaj, A., and Murali, T. Benchmarking algorithms  
448 for gene regulatory network inference from single-cell transcriptomic data. *Nature methods*, 17,  
449 2020.
- 450 [45] Qiu, X., Zhang, Y., Martin-Rufino, J. D., Weng, C., Hosseinzadeh, S., Yang, D., Pogson, A. N.,  
451 Hein, M. Y., Hoi (Joseph) Min, K., Wang, L., Grody, E. I., Shurtleff, M. J., Yuan, R., Xu, S.,  
452 Ma, Y., Replogle, J. M., Lander, E. S., Darmanis, S., Bahar, I., Sankaran, V. G., Xing, J., and  
453 Weissman, J. S. Mapping transcriptomic vector fields of single cells. *Cell*, 185, 2022.
- 454 [46] Riba, A., Oravec, A., Durik, M., Jiménez, S., Alunni, V., Cerciat, M., Jung, M., Keime, C.,  
455 Keyes, W. M., and Molina, N. Cell cycle gene regulation dynamics revealed by RNA velocity  
456 and deep-learning. *Nature Communications*, 13, 2022.
- 457 [47] Saelens, W., Cannoodt, R., Todorov, H., and Saeys, Y. A comparison of single-cell trajectory  
458 inference methods. *Nature Biotechnology*, 37, 2019.
- 459 [48] Schiebinger, G., Shu, J., Tabaka, M., Cleary, B., Subramanian, V., Solomon, A., Gould, J., Liu,  
460 S., Lin, S., Berube, P., Lee, L., Chen, J., Brumbaugh, J., Rigollet, P., Hochedlinger, K., Jaenisch,  
461 R., Regev, A., and Lander, E. S. Optimal-Transport Analysis of Single-Cell Gene Expression  
462 Identifies Developmental Trajectories in Reprogramming. *Cell*, 176, 2019.
- 463 [49] Spirtes, P. and Glymour, C. An algorithm for fast recovery of sparse causal graphs. *Social*  
464 *Science Computer Review*, 9, 1991.
- 465 [50] Tank, A., Covert, I., Foti, N., Shojaie, A., and Fox, E. Neural Granger Causality. *IEEE*  
466 *Transactions on Pattern Analysis and Machine Intelligence*, 2021.
- 467 [51] Tong, A., Huang, J., Wolf, G., van Dijk, D., and Krishnaswamy, S. TrajectoryNet: A Dynamic  
468 Optimal Transport Network for Modeling Cellular Dynamics. *International Conference on*  
469 *Machine Learning (ICML)*, 2020.
- 470 [52] Tong, S. and Koller, D. Active learning for structure in bayesian networks. *International Joint*  
471 *Conference on Artificial Intelligence (IJCAI)*, 17, 2001.
- 472 [53] Zhang, K., Huang, B., Zhang, J., Glymour, C., and Schölkopf, B. Causal discovery from nonsta-  
473 tionary/heterogeneous data: Skeleton estimation and orientation determination. *International*  
474 *Joint Conference on Artificial Intelligence (IJCAI)*, 2017.
- 475 [54] Zheng, X., Aragam, B., Ravikumar, P., and Xing, E. P. DAGs with NO TEARS: Continuous  
476 Optimization for Structure Learning. *Advances in Neural Information Processing Systems*  
477 *(NeurIPS)*, 2018.

## Supplementary Material

### A Proof of Proposition 1

Proposition 1 calculates the number of admissible structure graphs for a linear ODE system with correlated variables. We will first show the general case this is  $\prod_{i \in d} (2^{m_i} - 1)^{\mathcal{G}_i^1}$ , then analyze the case of an  $L^0$  penalty on the edges of  $G$ , which reduces the size of the set of admissible graphs to  $\prod_i (m_i)^{\mathcal{G}_i^1}$ .

*Proof.* Consider an identifiable linear system  $\frac{dx}{dt} = Ax$  where we directly observe  $(x, \frac{dx}{dt})$  with  $\mathcal{G}^*$  identifiable. Then the system with  $m = \mathbf{1}^d$  has exactly one admissible graph by definition. For each node, we analyze its set of child nodes in  $\mathcal{G}$ , i.e.  $c(u) = \{v \in \mathcal{V} \text{ s.t. } u \rightarrow v \in \mathcal{G}\}$ . For an identifiable system, each child  $v$  must have an incoming edge from its parent.

Next, we consider the process of adding a correlated variable, i.e. consider the situation of w.l.o.g. consider  $m = (s, 1, 1, \dots, 1)$  for some  $s > 1$ . Then for each child of  $c_j(v_1)$ , there are now  $s$  possible parents. This has multiplied the number of possible graphs by  $2^s - 1$ . Since each element of  $m$  is independent, this leads to the first statement, i.e.  $|\mathcal{G}'| = \prod_{i \in d} (2^{m_i} - 1)^{\mathcal{G}_i^1}$ .

Under an  $L^0$  penalty, then we constrain the possible graphs to  $s$  different graphs, where each child node picks exactly one of the  $s$  possible parents. This leads to the second statement,  $|\mathcal{G}'| = \prod_i (m_i)^{\mathcal{G}_i^1}$ .  $\square$

### B Experimental Details

#### B.1 Single Cell Dataset Preprocessing

We start with the processed data from [46]. We first filter it applying steps from the ScVelo tutorial. We then sub-select the genes of interest and use the “Ms” and “velocity” layers, which we normalize to mean zero standard deviation one for the states and scale the  $dx$  with the same parameters.

#### B.2 Baselines for Bayesian Dynamic Structure Learning

Existing Bayesian structure learning methods are typically constrained to learning DAGs. Temporal information about the the dynamic relationships amongst variables in a system can help alleviate this constraint. DiBS and BCD-Nets are two state-of-the-art Bayesian structure learning approaches for static systems. We apply versions of DiBS and BCD-Nets such that they are applicable in our Bayesian dynamic structure learning framework for learning cyclic graph structure from dynamic data. We use the approach taken in DiBS and parameterize the distribution over graphs as  $P_{\alpha_t}(G|Z) = \prod_i \prod_j P_{\alpha_t}(G_{ij}|Z_{ij})$ , where  $Z = U^T V$ ,  $U, V \in \mathbb{R}^{k \times d}$ . Here  $P_{\alpha_t}(G_{ij} = 1|Z_{ij}) = \sigma(\alpha_t Z_{ij})$ ,  $\sigma(x) = 1/(1 + e^{-\alpha_t x})$ , and  $\alpha_t = \alpha c(t)$  ( $t$  denotes the training iteration. We use  $c(t) = \sqrt{t}$ ). As  $t \rightarrow \infty$ ,  $P_{\alpha_t}(G|Z) \rightarrow \delta(G|Z)$ . In DiBS, Stein variational gradient decent (SVGD) [30] is used to iteratively transport particles  $Z$  to learn the target distribution. Following from the above parameterization, we implement a version of BCD-Nets by treating  $U \sim \mathcal{N}(\mu_u, \sigma_u^2)$ ,  $V \sim \mathcal{N}(\mu_v, \sigma_v^2)$ , and learning  $\mu_u, \mu_v, \sigma_u$ , and  $\sigma_v$ . Since our framework uses dynamic data, we incorporate DiBS and BCD-Nets within the framework (labeled DynDiBS and DynBCD, respectively) to leverage dynamic information for Bayesian structure learning of cyclic graphs.

#### B.3 Hyper-parameters for Baselines

For both DynBCD and DynDiBS we use  $k = d$  across datasets. Since DynDiBS is an ensemble based method, we use 1024 samples for the linear and non-linear synthetic systems and 1000 samples for the cellular system (both training and evaluation). Since DynBCD is a variational approach and doesn’t require parallelized model ensembles, we use a large quantity of samples for training and evaluation. In the case of the cellular system, since there is a significantly smaller quantity of admissible graphs, we use less samples for DynBCD. We use graph sparsity regularization denoted by  $\lambda_0$  and a temperature parameter  $T$  that scales the magnitude of the likelihood (e.g.  $\frac{1}{T^2} \text{MSE}(dx, \widehat{dx})$ ).



524 In Table 5 and Table 6 we outline the hyper-parameters we found to yield the most competitive results.  
 525 We use grid search to tune DynBCD and DynDiBS. All baselines are trained for 1000 epochs.

Table 5: Hyper-parameters for DynBCD. We define learning rate as  $\epsilon$ .

| <b>Linear System</b> |            |             |      |          |         |
|----------------------|------------|-------------|------|----------|---------|
| <b>Model</b>         | $\epsilon$ | $\lambda_0$ | $T$  | $\alpha$ | samples |
| $\ell$ -DynBCD       | 0.0001     | 0.001       | 0.01 | 0.1      | 5000    |
| $h$ -DynBCD          | 0.0001     | 0.0025      | 0.01 | 2        | 2000    |

  

| <b>Non-linear System</b> |            |             |      |          |         |
|--------------------------|------------|-------------|------|----------|---------|
| <b>Model</b>             | $\epsilon$ | $\lambda_0$ | $T$  | $\alpha$ | samples |
| $\ell$ -DynBCD           | 0.00005    | 0.01        | 0.01 | 2        | 5000    |
| $h$ -DynBCD              | 0.0001     | 0.001       | 0.01 | 1        | 2000    |

  

| <b>Cellular System</b> |            |             |      |          |         |
|------------------------|------------|-------------|------|----------|---------|
| <b>Model</b>           | $\epsilon$ | $\lambda_0$ | $T$  | $\alpha$ | samples |
| $\ell$ -DynBCD         | 0.0001     | 0.001       | 0.05 | 0.05     | 1000    |
| $h$ -DynBCD            | 0.00001    | 0.0005      | 0.1  | 2        | 1000    |

Table 6: Hyper-parameters for DynDiBS. We define learning rate as  $\epsilon$ .

| <b>Linear System</b> |            |             |      |          |          |
|----------------------|------------|-------------|------|----------|----------|
| <b>Model</b>         | $\epsilon$ | $\lambda_0$ | $T$  | $\alpha$ | $\gamma$ |
| $\ell$ -DynDiBS      | 0.0025     | 500         | 0.01 | 0.0001   | 3000     |
| $h$ -DynDiBS         | 0.0001     | 3           | 0.01 | 0.0001   | 10000    |

  

| <b>Non-linear System</b> |            |             |      |          |          |
|--------------------------|------------|-------------|------|----------|----------|
| <b>Model</b>             | $\epsilon$ | $\lambda_0$ | $T$  | $\alpha$ | $\gamma$ |
| $\ell$ -DynDiBS          | 0.001      | 10          | 0.01 | 0.0001   | 3000     |
| $h$ -DynDiBS             | 0.0001     | 0.1         | 0.01 | 0.0001   | 10000    |

  

| <b>Cellular System</b> |            |             |      |          |          |
|------------------------|------------|-------------|------|----------|----------|
| <b>Model</b>           | $\epsilon$ | $\lambda_0$ | $T$  | $\alpha$ | $\gamma$ |
| $\ell$ -DynDiBS        | 0.0025     | 1           | 0.05 | 0.0001   | 3000     |
| $h$ -DynDiBS           | 0.00001    | 0.1         | 0.01 | 0.01     | 3000     |

526 We note that when evaluation on validation and test data for Bayes-SHD and AUC metrics, we hard  
 527 threshold  $P_{\alpha_t}(G|Z)$ . We find that through training this the final  $\alpha_t$  is typically small enough in  
 528 magnitude such that  $P_{\alpha_t}(G|Z)$  does not yield a full threshold of  $Z$ . To this end, we select large  $\alpha_t$   
 529 when computing the KL metric to mimic hard threshold behaviour as experienced during training.  
 530 We use  $\alpha_t = 1 \times 10^4$  for DynBCD and  $\alpha_t = 1 \times 10^8$  for DynDiBS methods, respectively. In  
 531 DynDiBS The parameter  $\gamma$  helps control separation of particles  $Z$  during training. In general, we  
 532 found DynBCD and DynDiBS baselines are challenging to train and to find hyper-parameter settings  
 533 with good performance. In part, we believe this is due to the numerous hyper-parameters required to  
 534 tune as well as the general difficulty of the objective.

#### 535 B.4 Neural Network Architectures and Hyper-parameters

536 We parameterize  $P_F(s_i|s_{i-1}; \psi)$  and  $h_\phi$  with MLP architectures.  $P_F(s_i|s_{i-1}; \psi)$  takes the current  
 537 state as input and firsts computes common representations using a 3 layer MLP. Then a 2 layer  
 538 MLP with a softmax output activation takes the representations as input and outputs a distribution  
 539 over possible actions. The latter MLP is used to parameterize one head for each distribution  
 540  $P_F(s_i|s_{i-1}; \psi)$ . We use a hidden unit dimension of 128 and leaky rectified linear unit (Leaky ReLU)  
 541 activation functions for the  $P_F(s_i|s_{i-1}; \psi)$  MLP architecture. We use a uniform backward policy  
 542 for  $P_B(s_{i-1}|s_i; \psi)$ . To parameterize  $h_\phi$ , we use a 3 layer MLP with hidden layer dimensions of  
 543  $\{64, 64, 64\}$  and exponential linear unit activations (ELU). We consider two parametrizations for  $f_\theta$ :

Table 7: Hyper-parameters for DynGFN. We define learning rate as  $\epsilon$ ,  $m_{train}$  as number of training samples, and  $m_{eval}$  the number of evaluation samples.

| Linear System  |            |             |       |             |            |
|----------------|------------|-------------|-------|-------------|------------|
| Model          | $\epsilon$ | $\lambda_0$ | $T$   | $m_{train}$ | $m_{eval}$ |
| $\ell$ -DynGFN | 0.0001     | 100         | 0.01  | 1024        | 5000       |
| $h$ -DynGFN    | 0.00001    | 100         | 0.005 | 256         | 3000       |

  

| Non-linear System |            |             |       |             |            |
|-------------------|------------|-------------|-------|-------------|------------|
| Model             | $\epsilon$ | $\lambda_0$ | $T$   | $m_{train}$ | $m_{eval}$ |
| $\ell$ -DynGFN    | 0.0001     | 150         | 0.01  | 1024        | 5000       |
| $h$ -DynGFN       | 0.00001    | 150         | 0.005 | 256         | 3000       |

  

| Cellular System |            |             |      |             |            |
|-----------------|------------|-------------|------|-------------|------------|
| Model           | $\epsilon$ | $\lambda_0$ | $T$  | $m_{train}$ | $m_{eval}$ |
| $\ell$ -DynGFN  | 0.00005    | 45          | 0.01 | 1024        | 1000       |
| $h$ -DynGFN     | 0.0001     | 10          | 0.1  | 1024        | 1000       |

single linear parameters, i.e  $dx = \theta x$ , and a single hidden layer neural network  $dx = f_\theta(x)$ . We use these parametrizations to model linear and non-linear node-wise parent-child structural equations, where  $x \in \mathbb{R}^d$  are the node-wise input observations.

## B.5 Hyper-parameters for DynGFN

DynGFN requires setting a variety of hyper-parameters that lead to different trade offs in model performance. In particular,  $\lambda_0$  (sparsity encouragement for identified graphs), a temperature parameter  $T$  that scales the magnitude of the reward likelihood (e.g.  $\frac{1}{T^2} \text{MSE}(dx, \widehat{dx})$ ), learning rate  $\epsilon$ , softmax tempering  $c$  (we always use a cosine schedule for  $c$ , with a discrete period of 5 epochs), and number of training epochs. In our experiments we select hyper-parameter values that lead to competitive performance (this pertains to  $\ell$ -DynGFN and  $h$ -DynGFN models) by observing performance over a few values. We outline the selected hyper-parameters for each respective model in Table 7. Due to computational limits, we use less training samples than evaluation samples for DynGFN. We train DynGFN for 1000 epochs.

## B.6 GFlowNet Exploration vs. Exploitation

The general procedure for training GFlowNets is inspired from reinforcement learning where the primary objective is to learn a stochastic policy  $\pi(a|s)$  to sample actions from an action space given a current state. In our setting, the action space represents possible locations where an additional edge can be placed to an existing graph and each state is represented by a current graph. Since under this training procedure we are sampling from the GFlowNet policy  $P_F(s_i|s_{i-1}; \psi)$  at every iteration then attributing a reward associated to the sampled state/graph, the policy is susceptible to exploitation: if  $P_F(s_i|s_{i-1}; \psi)$  samples a graph(s) with a high reward, it becomes easy for the policy to focus on sampling said graphs since they yield high reward. To alleviate this we encourage exploration using softmax tempering on our stochastic policy, by multiplying the logits of our forward policy by  $1/c$  before applying the softmax function. A larger  $c$  flattens the stochastic policy such that exploration within the action space is encouraged. However, setting the parameters  $c$  is challenging and there exists a trade-off between exploring and exploiting the stochastic policy during optimization. We address this by using a cosine schedule for  $c$  such that  $1 \leq c \leq 1000$ . We treat the period of the cosine schedule as a hyper-parameter.

## B.7 Discussion of Training Dynamics

GFlowNets are a relatively recent class of models that can be challenging to optimize. We discuss some of the challenges with training them especially in the context of a learned energy function. We observed that in settings where the energy reward is fixed and we could proportionally penalize missing edges as well as the addition of incorrect edges (e.g.  $\ell$ -DynGFN), we were able to better learn

posterior over admissible graphs over models that require sparse priors and/or trainable energies. This suggests that DynGFN may be limited by an inadequate energy reward. However, we found training DynGFN with a trainable energy function challenging since the GFlowNet stochastic policy depends on the rewards, and vice versa. Further investigation and experimentation into this alternating optimization procedure is required.

## B.8 Evaluating Quality of Learned Posteriors

Using our indeterminacy model defined in section 5, we can determine  $P(G^*)$  for a given set of correlated variables, where  $G^*$  denotes the set of true equally admissible structures. Here we assume  $P(G^*)$  is a uniform distribution over  $G^*$  and determine the KL between  $Q(G)$  and  $P(G^*)$ . We compute the KL considering only the probabilities of a trained model to generate all structures in  $G^*$ , i.e.  $Q(G^*)$ . This is due to the computational constraints for calculating the KL for DynGFN since even for sparse graphs of moderate size this is a combinatorial computation. Nonetheless, this approach allows us to directly compare the learned posteriors  $Q(G)$  to a ground truth discrete distribution over structure  $G$  to evaluate the effectiveness of Bayesian structure learning approaches.

## B.9 Implementation Details

Our model is implemented in Pytorch and Pytorch Lightning and is available at <https://github.com/anonymous/anonymous>. Models were trained on a heterogeneous mix of HPC clusters for a total of ~1,000 GPU hours primarily on NVIDIA RTX8000 GPUs.

## C Additional Details

### C.1 Single-cell Biology and Gene Regulatory Network Inference

#### C.1.1 Gene Regulatory Networks and Cell Dynamics

One dynamical system of interest is that of cells. Cellular response to environmental stimuli or genetic perturbations can be modelled as a complex time-varying dynamical system [16, 1]. In general, dynamical system models are a useful tool for downstream scientific reasoning. In this work we are primarily interested in identifying the underlying cell dynamics from data. A reasonable model for cell dynamics is as a stochastic dynamical system with many, possibly unobserved, components. There are many data collection models for gaining insight into this system from single-cell RNA-sequencing data. We will primarily focus on RNA velocity type methods, where both  $x$  and an estimate of  $dx$  are available in each cell, but note that there are other assumptions to infer dynamics and regulation such as pseudotime-based methods [47, 1], and optimal transport methods [16, 48, 51, 21, 22]. After learning a possible explanatory regulation, this is used in downstream tasks, but the resulting conclusions drawn from these models are necessarily conditional on the inferred regulation. Motivated by gene regulatory networks, we explicitly model uncertainty over graphs which allows us to propagate the resulting uncertainty to downstream conclusions.

#### C.1.2 Learning Gene Regulatory Networks From Single-cell Data

Single-cell transcriptomics has an interesting property in that from a single measurement we can estimate both the current state  $x$  and the current velocity  $dx$ . Because mechanistically RNA undergoes a splicing process, we can measure the quantities of both the unspliced (early) and spliced (late) RNA in the cell. From these two quantities we can estimate the current RNA content for each gene and the current transcription rate. There exist many models for denoising and interpreting this data [27, 8, 45]. Furthermore, there exist more elaborate measurement techniques to extract more accurate velocity estimates [45]. The fact that we have an estimate of the current velocity is exceptionally useful for continuous time structure discovery because it allows us to avoid explicitly unrolling the dynamical system.

Learning the underlying causal structure from data is one of the open problems in biology. There are many works that attempt to learn the effect of a change in a gene, or the addition of a drug. These works often build models that directly predict the outcome of an intervention. This may be useful for certain applications, but often does not generalize well out of distribution. We would like to learn a

model of the underlying instantaneous dynamics that give rise to effects at longer time scales. This approach has a number of advantages. (1) it is closer to the mechanistic model; it may be easier to learn a model of the instantaneous dynamics rather than the dynamics over long time scales (details in Appendix C.2). (2) One model can be trained and applied to data from many sources including RNA-velocity, Pseudotime, Single-cell time series, and steady state perturbational data. (3) The instantaneous graph may be significantly sparser (and therefore easier to learn) than the summary graph or the equilibrium graph.

### C.1.3 Further Details on Experiments with Single-cell RNA-velocity Data

The process of Eukaryotic cell division can be divided into four well regulated stages based on the phenotype, Gap 1 ( $G_1$ ), Synthesis ( $S$ ), Gap 2 ( $G_2$ ), and Mitosis ( $M$ ). This process is a good starting point for GRN discovery as it is (1) relatively well understood, (2) deterministic, and (3) well studied with plentiful data. While there is an underlying control loop controlling the progression of the cell cycle, there are many other genes that also change during this cycle. To rediscover the true control process from data we must disentangle the true causal genes from the downstream correlated genes. This may become very difficult when we only observe dynamics at longer time scales. We hide a cell cycle regulator among two downstream genes that are highly correlated (Spearman  $\rho > 0.75$ ) and test whether we can model the Bayesian posterior – namely that we are uncertain about which of the three genes (Cdc25A, Mcm2, or Mcm5) is the true causal parent of Cdk1.

## C.2 Instantaneous Graph and Long-horizon Graph

The graph recovered depends on the time scale considered. We make a distinction between the conditional structure of the graph based on the time scale. Consider a system governed by  $\frac{dx(t)}{dt} = f(x(t))$ . We define the instantaneous graph as:

$$g_{i,j} := \cup_x \mathbf{1} \left( \frac{df(x)_j}{dx_i} \right), \quad i = 1, \dots, d, j = 1, \dots, d. \quad (6)$$

Here,  $\mathbf{1}(z) = 1$  if  $z \neq 0$ , otherwise  $\mathbf{1}(z) = 0$ . We can define the temporal summary of the system drift  $f$  as:

$$F(T, x) = x_0 + \int_0^T f(x(t))dt. \quad (7)$$

Then, we can define a long-horizon graph over long time-scales as:

$$G_{i,j} := \cup_x \mathbf{1} \left( \frac{\partial F(T, x)_j}{\partial x_i} \right), \quad i = 1, \dots, d, j = 1, \dots, d. \quad (8)$$

If we are integrating the drift  $f$  over long time-scales, the long-horizon graph may be less sparse than the instantaneous graph. In cellular systems, this equates to observing cell dynamics over long time-scales, in turn observing increase quantities of correlations between variables of the system. Thus, trying to delineate the instantaneous dynamics from long time-scales may be difficult depending on the underlying system dynamics.

## C.3 Further Discussion on Future Work

Although DynGFN is currently limited to smaller systems, we foresee approaches that would enable some degree of scaling DynGFN to larger systems. One approach is to leverage biological information of known gene-gene connections as a more informative prior for DynGFN. Currently, DynGFN learns a forward stochastic policy for  $Q(G|D)$  starting from an initialized state  $s_0$  of all zeros. Instead, we can define  $\tilde{s}_0$  using a prior of high confidence biological connections and sequentially add edges starting from this new initial state. This would reduce the number of possible structures DynGFN would need to search over, thus improving the potentially scalability of DynGFN. Another approach is to learn structure between sets of genes (variables) rather than single genes. Since GRNs are generally very sparse, it makes sense to group genes in sets. Consequently, we can then learn structure between these grouped genes, rather than just individual genes. In turn, DynGFN can explore/learn the structure over a smaller space while effectively capturing structure between a significantly larger set of genes. To group genes, we would use prior biological information, either from existing literature or expert domain knowledge.

669 In this work we exploit the use of a minimal prior, i.e.  $L^0$  sparsity prior, for learning Bayesian  
670 dynamic structure between variables. In general, the aforementioned approaches for scaling DynGFN  
671 to larger systems involve the use of more informative priors on  $G$ . Although we mention two ways  
672 we foresee approaching this in the biological context of GRN inference, the general approach of  
673 using more informative priors can help scale DynGFN to larger systems across applications.

#### 674 **C.4 Broader Impacts**

675 While it is important to acknowledge the potential risks of drawing incorrect scientific conclusions  
676 due to incorrect assumptions, our work embraces a Bayesian perspective for structure learning. A  
677 key component of our work is to account for uncertainty within our method, aiming to minimize the  
678 chances of incorrect conclusions. It is important to note that the accuracy of conclusions relies on  
679 applying the method in settings that align with the underlying assumptions, such as causal sufficiency  
680 and the use of dynamic observational data. By adhering to these guidelines, our approach holds  
681 promise for producing robust and reliable scientific outcomes.
